# Supplementary material
Source: publisher figshare collection journal article supplement (https://springernature.figshare.com/ndownloader/files/14001173)
Supplement: Supplementary file [file 14001173]

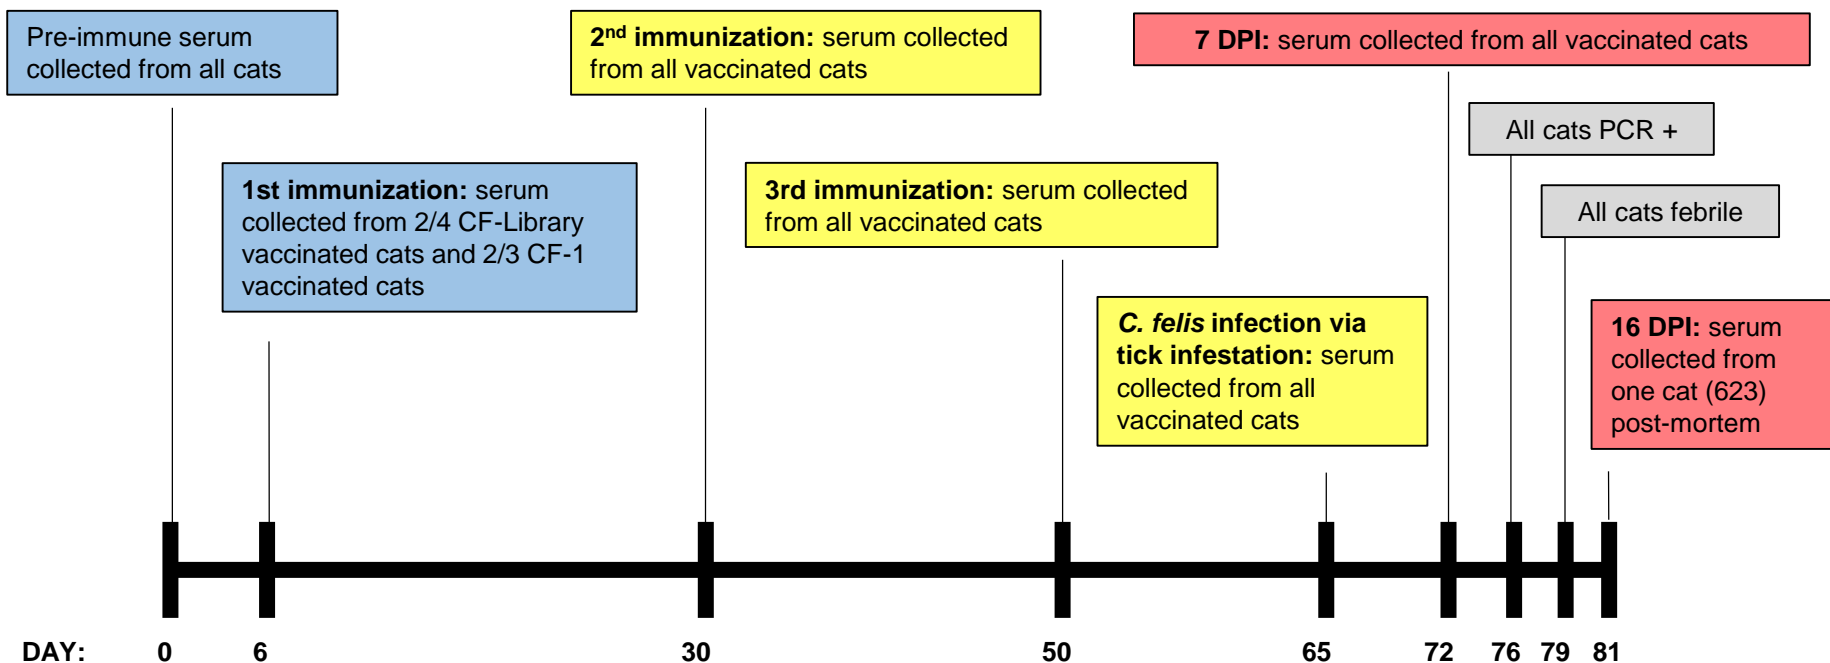

**Supplementary Figure 2. Timeline of vaccination, infection, and sample collection for vaccinated cats.**

**KEY**

- Pre-vaccination, pre-infection serum
- Post-vaccination, pre-infection serum
- Post-vaccination, post-infection serum
